# Supplementary material for: Behavioral and Neurochemical Shifts at the Hippocampus and Frontal Cortex Are Associated to Peripheral Inflammation in Balb/c Mice Infected with Brucella abortus 2308
Source: MDPI journal article supplement (doi:10.3390/microorganisms9091937), 2021-09-11
Supplement: s1 [file s1]

### Supplementary material

Table with values from behavioral test and cytokines results which complements figures 1-5.

Table S1. Behavioral test results in Balb/c infected with *B. abortus* 2308

| <b>Motor Balance and Coordination Test</b> |                 |              |              |                         |                         |                         |
|--------------------------------------------|-----------------|--------------|--------------|-------------------------|-------------------------|-------------------------|
|                                            | <b>Groups</b>   |              |              | <i>post hoc test</i>    |                         |                         |
|                                            | Control<br>n=12 | 14-PI<br>n=6 | 21-PI<br>n=6 | 14-PI<br>vs.<br>Control | 21-PI<br>vs.<br>Control | 14-PI<br>vs.<br>Control |
| Time (s)                                   | 12.2 ± 3.4      | 20 ± 8.0     | 19.1 ± 2.2   | ***                     | **                      | ns                      |
| <b>Forelimb grip strength test</b>         |                 |              |              |                         |                         |                         |
|                                            | <b>Groups</b>   |              |              | <i>post hoc test</i>    |                         |                         |
|                                            | Control<br>n=12 | 14-PI<br>n=6 | 21-PI<br>n=6 | 14-PI<br>vs.<br>Control | 21-PI<br>vs.<br>Control | 14-PI<br>vs.<br>Control |
| Resistance (N)                             | 0.39 ± 0.04     | 0.24 ± 0.04  | 0.27 ± 0.04  | ****                    | ****                    | ns                      |
| <b>Open field test</b>                     |                 |              |              |                         |                         |                         |
|                                            | <b>Groups</b>   |              |              | <i>post hoc test</i>    |                         |                         |
|                                            | Control<br>n=12 | 14-PI<br>n=6 | 21-PI<br>n=6 | 14-PI<br>vs.<br>Control | 21-PI<br>vs.<br>Control | 14-PI<br>vs.<br>Control |
| Changes in square                          | 28.5 ± 4.0      | 12.5 ± 2.6   | 13.83 ± 2.5  | **                      | **                      | ns                      |
| <b>Tail suspension test</b>                |                 |              |              |                         |                         |                         |
|                                            | <b>Groups</b>   |              |              | <i>post hoc test</i>    |                         |                         |
|                                            | Control<br>n=12 | 14-PI<br>n=6 | 21-PI<br>n=6 | 14-PI<br>vs.<br>Control | 21-PI<br>vs.<br>Control | 14-PI<br>vs.<br>Control |
| Time (s)                                   | 66.92 ± 10      | 133.3 ± 22   | 126.5 ± 14   | ****                    | ****                    | ns                      |
| <b>Forced swimming test</b>                |                 |              |              |                         |                         |                         |
|                                            | <b>Groups</b>   |              |              | <i>post hoc test</i>    |                         |                         |
|                                            | Control<br>n=12 | 14-PI<br>n=6 | 21-PI<br>n=6 | 14-PI<br>vs.<br>Control | 21-PI<br>vs.<br>Control | 14-PI<br>vs.<br>Control |
| Time (s)                                   | 47.5 ± 9.1      | 155 ± 24     | 76.8 ± 32    | ****                    | **                      | ****                    |

In all cases the mean ± standard deviation is described. 14-PI= 14 days post infection, 21-PI= 21 days post infection. ANOVA tests were used for motor balance and coordination, tail suspension, and forced swimming tests. Kruskal–Wallis tests were used for forelimb grip strength and open field tests. Statistical significance was recognized when  $p < 0.05$ . Statistical significance is represented as follows: \*  $p < 0.05$ ; \*\*  $p < 0.01$ ; \*\*\*  $p < 0.001$ ; \*\*\*\*  $p < 0.0001$ .

Table S2. Determination of neurotransmitters in the cerebellum

| Neurotransmitter<br>(pg/mL) | Groups          |              |              | <i>Post hoc test</i>    |                         |                         |
|-----------------------------|-----------------|--------------|--------------|-------------------------|-------------------------|-------------------------|
|                             | Control<br>n=12 | 14-PI<br>n=6 | 21-PI<br>n=6 | 14-PI<br>vs.<br>Control | 21-PI<br>vs.<br>Control | 14-PI<br>vs.<br>Control |
| D                           | 4 ± 0.7         | 4.8 ± 1.2    | 4 ± 1.5      | ns                      | ns                      | ns                      |
| E                           | 2.4 ± 0.3       | 2.6 ± 0.9    | 2.2 ± 0.4    | ns                      | ns                      | ns                      |
| NE                          | 13.8 ± 2.5      | 16.2 ± 1.3   | 13.2 ± 3.5   | ns                      | ns                      | ns                      |
| 5-HT                        | 12.2 ± 2.7      | 15.2 ± 1.8   | 12.4 ± 1.5   | *                       | ns                      | ns                      |

In all cases the mean ± standard deviation is described. 14-PI= 14 days post infection, 21-PI= 21 days post infection. ANOVA tests were used in all cases, except for dopamine, for which Kruskal–Wallis tests were employed. Statistical significance was recognized when  $p < 0.05$ . Statistical significance is represented as follows: \*  $p < 0.05$ .

Table S3 Determination of neurotransmitters in the frontal cortex

| Neurotransmitter<br>(pg/mL) | Groups          |              |              | <i>Post hoc test</i>    |                         |                         |
|-----------------------------|-----------------|--------------|--------------|-------------------------|-------------------------|-------------------------|
|                             | Control<br>n=12 | 14-PI<br>n=6 | 21-PI<br>n=6 | 14-PI<br>vs.<br>Control | 21-PI<br>vs.<br>Control | 14-PI<br>vs.<br>Control |
| D                           | 15.9 ± 2.1      | 11.6 ± 2.7   | 13.3 ± 3.9   | *                       | ns                      | ns                      |
| E                           | 7.7 ± 1.7       | 5.5 ± 1.4    | 5.5 ± 1.8    | ns                      | ns                      | ns                      |
| NE                          | 14.9 ± 1.8      | 12.5 ± 2.8   | 12.1 ± 2.4   | ns                      | ns                      | ns                      |
| 5-HT                        | 25.3 ± 4.4      | 14.6 ± 2.5   | 23.4 ± 7.4   | ***                     | ns                      | *                       |

In all cases the mean ± standard deviation is described. 14-PI= 14 days post infection, 21-PI= 21 days post infection. An ANOVA test was used in all cases, except for epinephrine, in which the Kruskal–Wallis test was applied. Statistical significance was recognized when  $p < 0.05$ . Statistical significance is represented as follows:

\*  $p < 0.05$ ; \*\*\*  $p < 0.001$ .

Table S4. Determination of neurotransmitters in the hippocampus

| Neurotransmitter<br>(pg/mL) | Groups          |              |              | <i>Post hoc test</i>    |                         |                         |
|-----------------------------|-----------------|--------------|--------------|-------------------------|-------------------------|-------------------------|
|                             | Control<br>n=12 | 14-PI<br>n=6 | 21-PI<br>n=6 | 14-PI<br>vs.<br>Control | 21-PI<br>vs.<br>Control | 14-PI<br>vs.<br>Control |
| D                           | 91.3 ±32.7      | 29.1 ±3.4    | 83.4 ± 15.5  | ***                     | ns                      | **                      |
| E                           | 2.4 ±0.6        | 2.2 ±0.6     | 2.3 ± 0.5    | ns                      | ns                      | ns                      |
| NE                          | 10.4 ± 1.2      | 7.1 ± 0.4    | 10 ± 1.5     | ****                    | ns                      | **                      |
| 5-HT                        | 22.3 ±4.2       | 8.2 ±2.4     | 22.4 ± 4.7   | **                      | ns                      | **                      |

In all cases the mean ± standard deviation is described. 14-PI= 14 days post infection, 21-PI= 21 days post infection. ANOVA tests were used in all cases, except for serotonin, in which the Kruskal–Wallis tests were utilized. Statistical significance was recognized when  $p < 0.05$ . Statistical significance is represented as follows:

\*\*  $p < 0.01$ ; \*\*\*  $p < 0.001$ ; \*\*\*\*  $p < 0.0001$ .

Table S5. Inflammatory profile in Balb/c mice infected with *B. abortus* 2308

| Cytokine<br>(pg/mL) | Groups          |                  |                  | <i>post hoc</i> test    |                         |                         |
|---------------------|-----------------|------------------|------------------|-------------------------|-------------------------|-------------------------|
|                     | Control<br>n=12 | 14-PI<br>n=6     | 21-PI<br>n=6     | 14-PI<br>vs.<br>Control | 21-PI<br>vs.<br>Control | 14-PI<br>vs.<br>Control |
| TNF- $\alpha$       | 6.9 $\pm$ 3.2   | 18.3 $\pm$ 4.5   | 6.57 $\pm$ 1.8   | ****                    | ns                      | ****                    |
| IL-6                | 7.5 $\pm$ 1.5   | 14.6 $\pm$ 3.3   | 4.6 $\pm$ 2.2    | ****                    | **                      | ****                    |
| IL-12               | 15.3 $\pm$ 3.6  | 28.9 $\pm$ 8.6   | 21.9 $\pm$ 6.8   | ****                    | *                       | ns                      |
| IL-10               | 35.1 $\pm$ 13.5 | 16.4 $\pm$ 9.9   | 16.59 $\pm$ 11.4 | ***                     | ***                     | ns                      |
| IFN- $\gamma$       | 15.3 $\pm$ 4.9  | 245.8 $\pm$ 88.7 | 16.0 $\pm$ 5.0   | ****                    | ns                      | ****                    |

In all cases the mean  $\pm$  standard deviation is described. 14-PI= 14 days post infection, 21-PI= 21 days post infection. Kruskal–Wallis tests were used in all cases, except for IFN- $\gamma$ , in which ANOVA tests were used.

Statistical significance was recognized when  $p < 0.05$ . Statistical significance is represented as follow: \*\*  $p < 0,01$ ;

\*\*\*  $p < 0,001$ ; \*\*\*\*  $p < 0,0001$ ; ns = no significance.
